# Supplementary material for: Efficient Multiplex Genome Editing Induces Precise, and Self-Ligated Type Mutations in Tomato Plants
Source: PubMed Central journal article supplement (PMC6037947; doi:10.3389/fpls.2018.00916), 2018-07-03
Supplement: Table_1.pdf [file Table_1.pdf]

**Supplemental Table 1. Primer lists for construction of multiplex CRISPR/Cas9 vectors and mutation analyses.**

|                         |                                                          |                                                                                                                        |
|-------------------------|----------------------------------------------------------|------------------------------------------------------------------------------------------------------------------------|
| Fw_Psef1 cloning        | TTCCGCGGTGGCGCGCCGTAGAGTTTCATTTAAAAATCTT                 | For Constructing the pMgPsef1_237-2A-GFP                                                                               |
| Rv_Psef1 cloning        | GTAAAAATACTCTAGACACTAAGAAACTGCATTTTACA                   | For Constructing the pMgPsef1_237-2A-GFP                                                                               |
| Fw_Ps16 cloning         | TTCCGCGGTGGCGCGCCACATGTTCCAAACCTAA                       | For Constructing the pMgPs16_237-2A-GFP                                                                                |
| Rv_Ps16 cloning         | GTAAAAATACTCTAGCTGAATCGGCTCTCGATGAA                      | For Constructing the pMgPs16_237-2A-GFP                                                                                |
| Fw_SINADK2A_tgRNA-gRNA1 | TTGGGTCTCCAAACCAGCCATTCACTGTTTGTACTGCACCAGCCGGGAATCGAA   | For amplifying the tRNA-gRNA unit of SINADK2A_gRNA1/2                                                                  |
| Rv_SINADK2A_tgRNA-gRNA2 | TTGGGTCTCGTGCAGCTGTACTCTTACGACGCCAGGTTTTAGAGCTAGAAATAGCA | For amplifying the tRNA-gRNA unit of SINADK2A_gRNA1/2                                                                  |
| Fw_SIIAA9_tgRNA-gRNA2   | TTGGGTCTCGTGCAGAGCTCAGGCTCGGTCTACCGTTTTAGAGCTAGAAATAGCA  | For amplifying the tRNA-gRNA units of SIIAA9_gRNA2/3, SIIAA9_gRNA2/4, SIIAA9_gRNA2/5, or SIIAA9_gRNA2/6                |
| Rv_SIIAA9_tgRNA-gRNA3   | TTGGGTCTCCAAACCACCTCTTTTCGGGAGACTGACTGCACCAGCCGGGAATCGAA | For amplifying the tRNA-gRNA unit of SIIAA9_gRNA2/3                                                                    |
| Rv_SIIAA9_tgRNA-gRNA4   | TTGGGTCTCCAAACCACCTGAACCTTACTGCATGCTGCACCAGCCGGGAATCGAA  | For amplifying the tRNA-gRNA unit of SIIAA9_gRNA2/4                                                                    |
| Rv_SIIAA9_tgRNA-gRNA5   | TTGGGTCTCCAAACCAGGAAATCACTAGTATTCTGCACCAGCCGGGAATCGAA    | For amplifying the tRNA-gRNA unit of the SIIAA9_gRNA2/5                                                                |
| Rv_SIIAA9_tgRNA-gRNA6   | TTGGGTCTCCAAACCACACTTTTCCATAGCCCTTGTGCACCAGCCGGGAATCGAA  | For amplifying the tRNA-gRNA unit of the SIIAA9_gRNA2/6                                                                |
| Fw_Psef1                | GCCAGTGCCAAGCTTGCGCCGTAGAGTTTCATTTAAAA                   | For constructing the pRI SIEF1 $\alpha$ -GFP                                                                           |
| Rv_Psef1                | TGTGATGTATCTAGACACTAAGAAACTGCATTTACA                     | For constructing the pRI SIEF1 $\alpha$ -GFP                                                                           |
| Fw_SINADK2-gRNA1        | TATTTTCAGAGGTGAAATGAAGAGG                                | For amplifying SINADK2A-gRNA1/2 region or Cel-1 assay of SINADK2A-gRNA1 region                                         |
| Rv_SINADK2-gRNA1        | GCAGACTGAGTCTCTTTTGTGTTGA                                | For Cel-1 assay of SINADK2A-gRNA1 region                                                                               |
| Fw_SINADK2-gRNA2        | CATCACACCTTCACTGGAAGATAACTTG                             | For Cel-1 assay of SINADK2A-gRNA2 region                                                                               |
| Rv_SINADK2-gRNA2        | CAGCAGTAGTAAATGAAATCACAAGGTAA                            | For amplifying SINADK2A-gRNA1/2 region or Cel-1 assay of SINADK2A-gRNA2 region                                         |
| Fw_SIIAA9_gRNA2         | GGAGGAGGAGGCCAGAGTAATGTAA                                | For amplifying SIIAA9-gRNA2/4, SIIAA9-gRNA2/5, or SIIAA9-gRNA2/6 region and mutation analyses of SIIAA9-gRNA2/3 region |
| Rv_SIIAA9_gRNA3         | GTTGCCACTAACTACTGTTTTCTGCGAT                             | For mutation analyses of SIIAA9-gRNA2/3 region                                                                         |
| Rv_SIIAA9_gRNA4         | GAAGGCAGCATGAATCTTGA                                     | For amplifying SIIAA9-gRNA2/4 region                                                                                   |
| Rv_SIIAA9_gRNA5         | AACTTTCATGACGAACAGCTG                                    | For amplifying SIIAA9-gRNA2/5 region                                                                                   |
| Rv_SIIAA9_gRNA6         | CTTAATCAAACGACAAACGTTGGGTC                               | For amplifying SIIAA9-gRNA2/6 region                                                                                   |
